# Supplementary material for: Nitrogen-doped-carbon-coated SnO2nanoparticles derived from a SnO2@MOF composite as a lithium ion battery anode material
Source: Royal Society of Chemistry journal article supplement (doi:10.1039/c7ra02703f), 2017-01-01
Supplement: c7ra02703f1.pdf [file c7ra02703f1.pdf]

# Electronic Supplementary Information (ESI)

## Nitrogen-doped-carbon-coated SnO<sub>2</sub> nanoparticles derived from SnO<sub>2</sub>@MOF composite as lithium ion battery anode material

Fengcai Li,<sup>‡a</sup> Jia Du,<sup>‡a</sup> Hao Yang,<sup>a</sup> Wei Shi<sup>\*ab</sup> and Peng Cheng<sup>\*abc</sup>

<sup>a</sup> Department of Chemistry, Key Laboratory of Advanced Energy Material Chemistry (MOE), Nankai University, Tianjin 300071, China.

<sup>b</sup> Collaborative Innovation Center of Chemical Science and Engineering (Tianjin), Nankai University, Tianjin 300071, China.

<sup>c</sup> State Key Laboratory of Elemento-Organic Chemistry, Nankai University, Tianjin 300071, China.

E-mail: shiwei@nankai.edu.cn (WS); pcheng@nankai.edu.cn (PC)

### Contents of ESI

|                 |                                                                                                                                                                   |     |
|-----------------|-------------------------------------------------------------------------------------------------------------------------------------------------------------------|-----|
| <b>Fig. S1</b>  | SEM images of initial SnO <sub>2</sub> nanoparticles (a), calcination product of SnO <sub>2</sub> nanoparticles at 800 °C (b), SOZ-1 (c), SOZ-2(d) and SOZ-3 (e). | S2  |
| <b>Fig. S2</b>  | TGA curves of the precursors.                                                                                                                                     | S3  |
| <b>Fig. S3</b>  | PXRD of SOC-1 (a) and SOC-2 (b).                                                                                                                                  | S4  |
| <b>Fig. S4</b>  | Raman spectra of SnO <sub>2</sub> in initial status (a) and in SOC-3(b)                                                                                           | S5  |
| <b>Fig. S5</b>  | Raman spectra of SOC-1 (a) and SOC-2 (b).                                                                                                                         | S6  |
| <b>Fig. S6</b>  | TGA curves of (a) SOC-1, (b) SOC-2 and (c) SOC-3.                                                                                                                 | S7  |
| <b>Fig. S7</b>  | SEM of SOC-1 (a) and SOC-2 (b).                                                                                                                                   | S8  |
| <b>Fig. S8</b>  | Rate performances of SOC-1 (a) and SOC-3 (b) from 50 to 500 mA g <sup>-1</sup> and SOC-3 (c) from 50 to 2000 mA g <sup>-1</sup> .                                 | S9  |
| <b>Fig. S9</b>  | Charge-discharge curve of the electrode made of SOC-3 at 500 mA g <sup>-1</sup> .                                                                                 | S10 |
| <b>Fig. S10</b> | TEM image of SOC-3 after tenth cycles in the current density of 500 mA g <sup>-1</sup> .                                                                          | S11 |
| <b>Fig. S11</b> | The electrochemical impedance spectra of SOC-3.                                                                                                                   | S12 |
| <b>Table S1</b> | The carbon, nitrogen, and hydrogen contents of precursors and calcination products from elemental analysis.                                                       | S13 |
| <b>Table S2</b> | The capacities of selected SnO <sub>2</sub> -based anode materials in lithium-ion batteries.                                                                      | S14 |

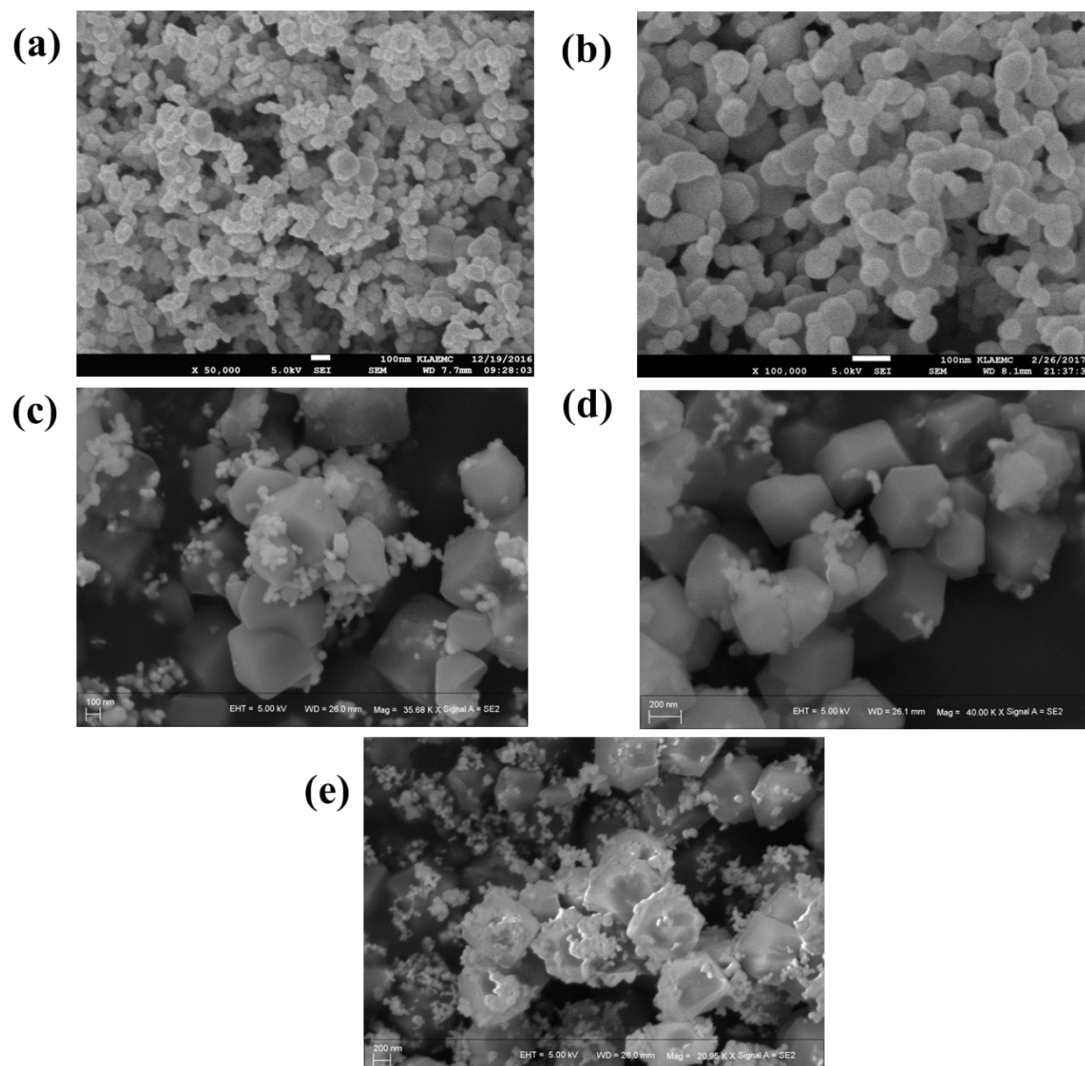

**Fig. S1** SEM images of initial  $\text{SnO}_2$  nanoparticles (a), calcination product of  $\text{SnO}_2$  nanoparticles at 800 °C in Ar atmosphere for 3 h (b), SOZ-1 (c), SOZ-2(d) and SOZ-3 (e). The size of octahedral ZIF-8 nanocrystals is about 200 nm. The size of initial  $\text{SnO}_2$  nanoparticles and its calcination products express almost the same size and morphology. The uniform  $\text{SnO}_2$  nanoparticles is highly dispersed, and were tightly adhered to the surface of ZIF-8.

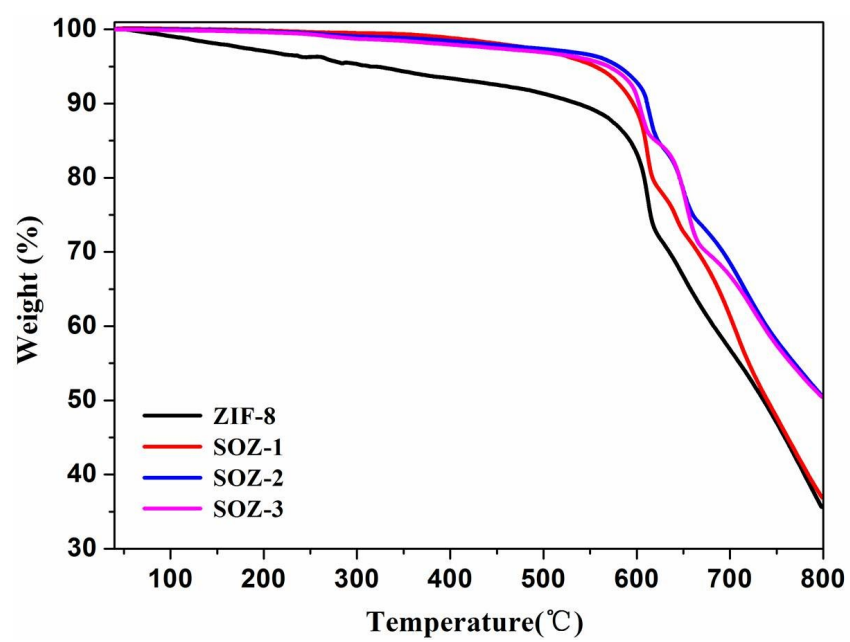

**Fig. S2** TGA curves of the precursors.

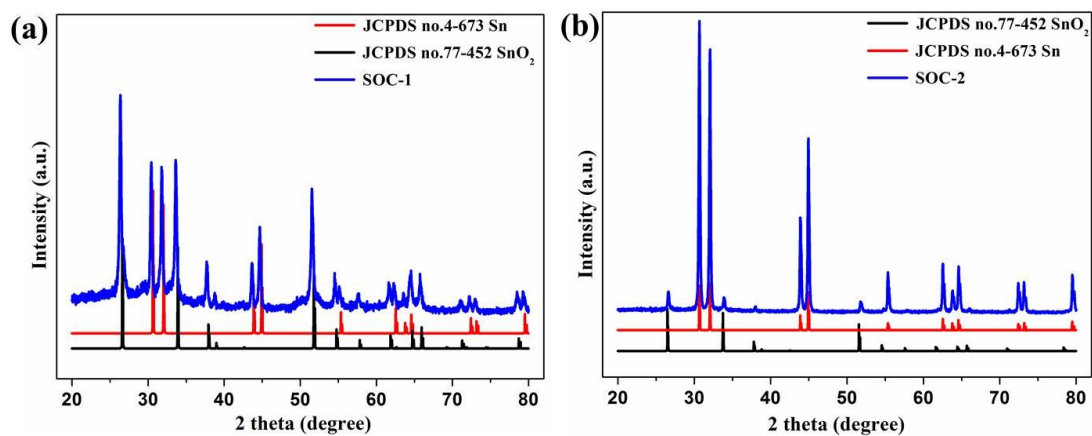

**Fig. S3** PXRD of SOC-1 (a) and SOC-2 (b). There are peaks from Sn nanoparticles which are from carbonthermal reduction of SnO<sub>2</sub>. All the diffraction peaks could be indexed to the tetragonal Sn nanoparticles (JCPDS no. 4-673) and tetragonal SnO<sub>2</sub> nanoparticles (JCPDS no. 21-1250).

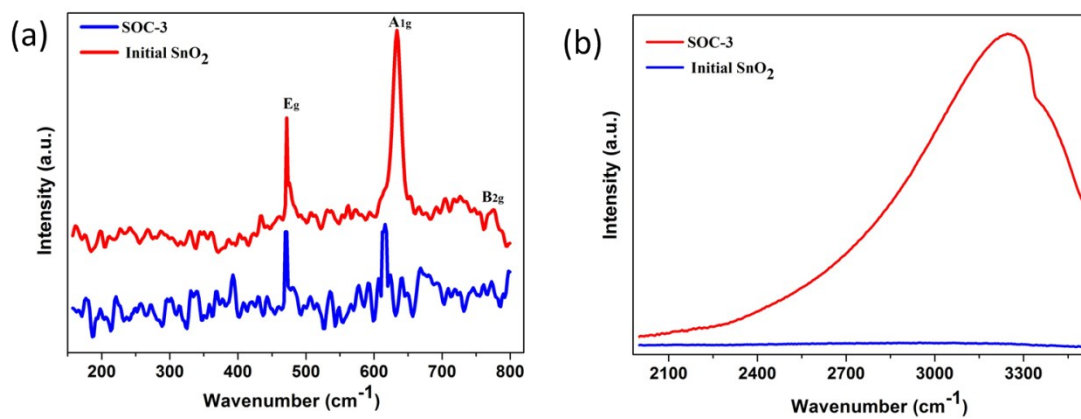

**Fig. S4** Raman spectra of SnO<sub>2</sub> in initial status (a) and in SOC-3(b).

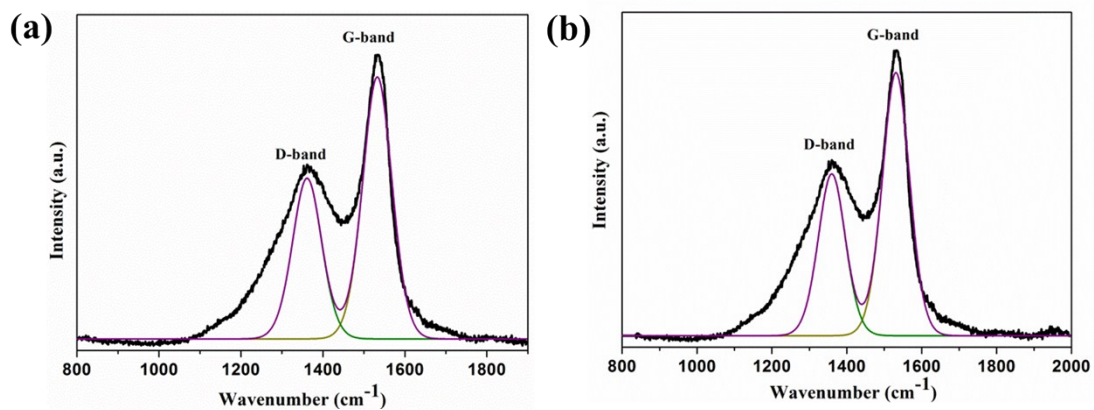

**Fig. S5** Raman spectra of SOC-1 (a) and SOC-2 (b).

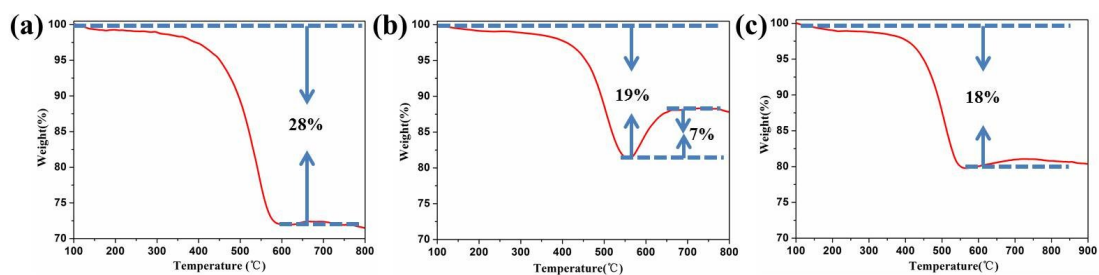

**Fig. S6** TGA curves of SOC-1 (a), SOC-2 (b) and SOC-3(c). According to TGA, the carbon contents are 28% for SOC-1, 19% for SOC-2, 18% for SOC-3. The carbon and nitrogen contents of the three materials from TGA are well consistent with elemental analysis results.

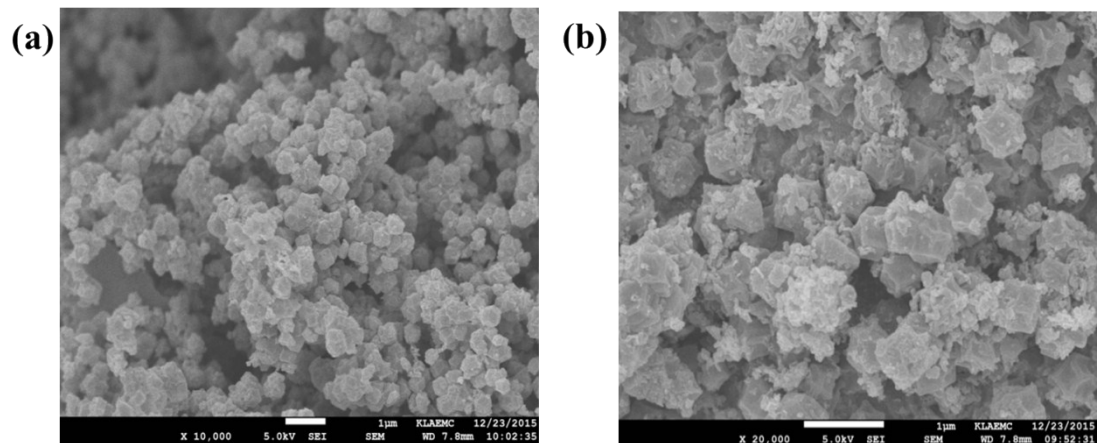

**Fig. S7** SEM of SOC-1 (a) and SOC-2 (b).

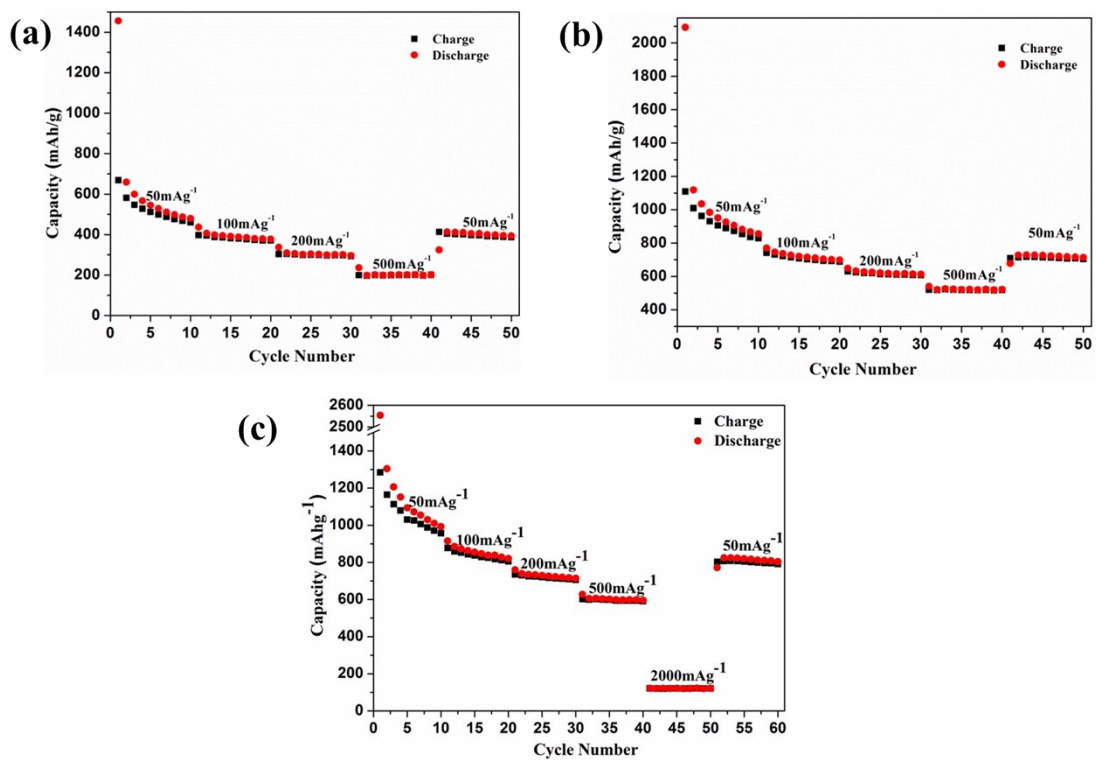

**Fig. S8** Rate performances of SOC-3 (a) from 50 to 2000 mA g<sup>-1</sup>, SOC-1 (a) and SOC-3 (b) electrodes from 50 to 500 mA g<sup>-1</sup> and SOC-3 (c) from 50 to 2000 mA g<sup>-1</sup>.

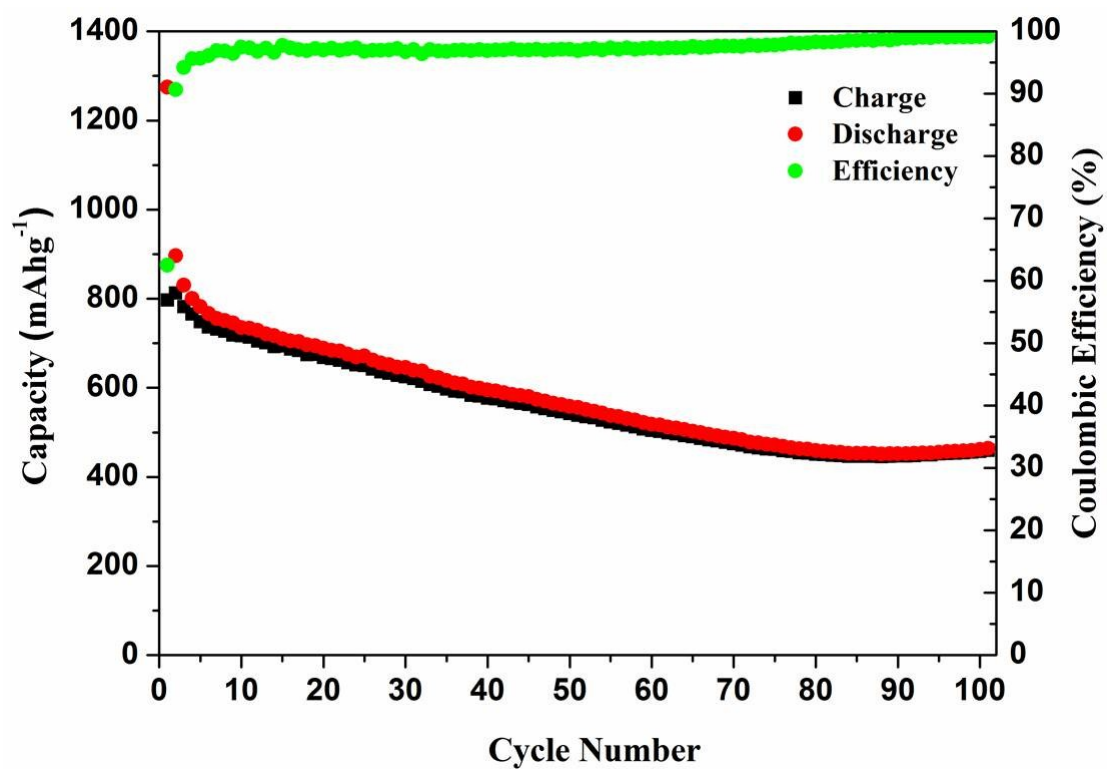

Fig. S9 Charge-discharge curve of the electrode made of SOC-3 at 500 mA g<sup>-1</sup>.

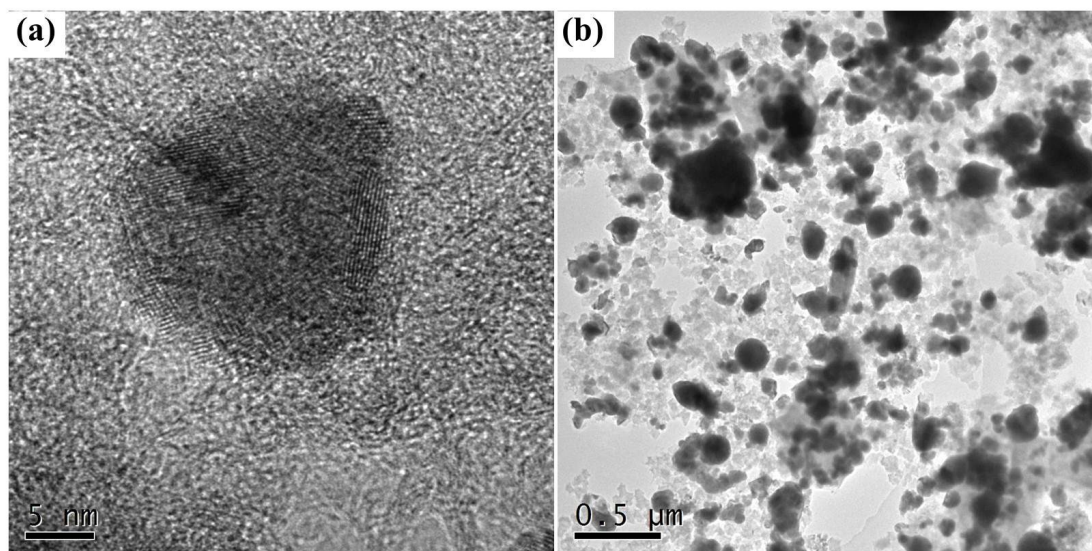

**Fig. S10** TEM image of SOC-3 after tenth cycle in the current density of 500 mA g<sup>-1</sup>.

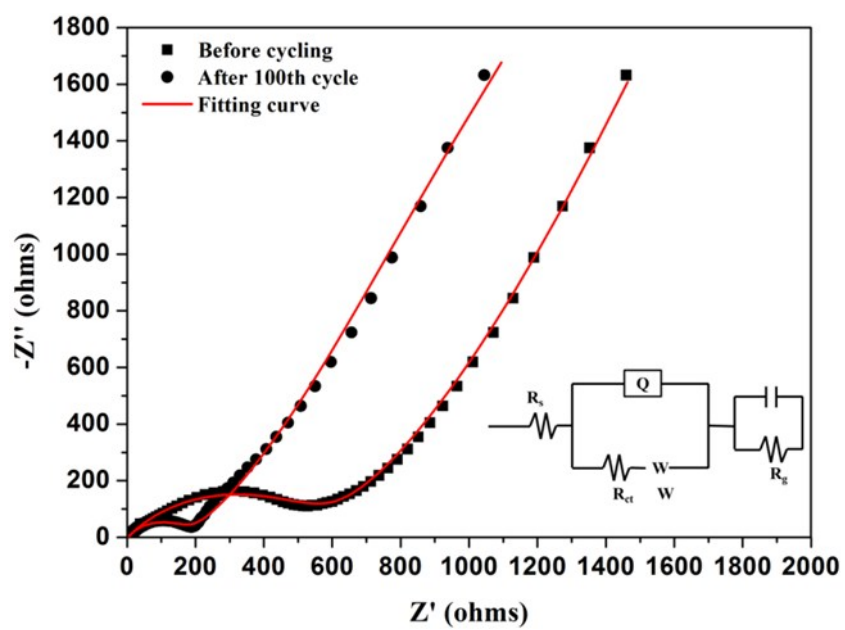

Fig. S11 The electrochemical impedance spectra of SOC-3.

**Table S1** The carbon, nitrogen, and hydrogen contents of precursors and calcination products from elemental analysis.

|       | C/%   | N/%   | H/%  |
|-------|-------|-------|------|
| SOZ-1 | 33.45 | 19.00 | 3.44 |
| SOZ-2 | 27.51 | 14.27 | 3.29 |
| SOZ-3 | 22.77 | 11.76 | 3.08 |
| SOC-1 | 23.51 | 4.74  | 1.25 |
| SOC-2 | 19.11 | 5.99  | 1.04 |
| SOC-3 | 17.33 | 4.16  | 1.06 |

**Table S2** The capacities of selected SnO<sub>2</sub>-based anode materials in lithium-ion batteries.

| Active material                                           | Synthesis route                                            | SnO <sub>2</sub> size (nm) | Capacity (mA h g <sup>-1</sup> )/<br>Current density (A g <sup>-1</sup> )/<br>Cycle Number |
|-----------------------------------------------------------|------------------------------------------------------------|----------------------------|--------------------------------------------------------------------------------------------|
| <b>SnO<sub>2</sub>@C (This work)</b>                      | <b>ultrasonication and pyrolysis</b>                       | <b>2-4</b>                 | <b>1032/0.1/150</b>                                                                        |
| SnO <sub>2</sub> @C <sup>42</sup>                         | Introduction and pyrolysis                                 | 5-10                       | 880/0.1/200                                                                                |
| 3D SnO <sub>2</sub> /graphene foam <sup>53</sup>          | ultrasonic, freeze-drying, anneal                          | 6-12                       | 533.7/1/150                                                                                |
| Reduced graphene oxide/SnO <sub>2</sub> <sup>54</sup>     | microwave irradiation and anneal                           | 100-200                    | 649/0.05/30                                                                                |
| Carbon-Coated SnO <sub>2</sub> Nanocolloids <sup>55</sup> | hydrothermal and calcined                                  | 50-70                      | 440/0.1/300                                                                                |
| SnO <sub>2</sub> @polypyrrole Nanotubes <sup>56</sup>     | microwave-assisted and pyrolysis                           | 2-3                        | 790/0.2/200                                                                                |
| Graphene-SnO <sub>2</sub> -carbon <sup>57</sup>           | hydrothermal and anneal                                    | 28-50                      | 878/0.05/50                                                                                |
| Polypyrrole (PPy)-derived SnO <sub>2</sub> <sup>58</sup>  | hydrothermal and calcination                               | 5-10                       | 598.3/0.1/50                                                                               |
| N-doped graphene-SnO <sub>2</sub> <sup>59</sup>           | stirring and thermally treated                             | 2-3                        | 910/0.05/50                                                                                |
| PANI-coated SnO <sub>2</sub> /graphene <sup>60</sup>      | in situ polymerization                                     | 4-8                        | 502/1/100                                                                                  |
| graphene-based SnO <sub>2</sub> <sup>61</sup>             | solvothetmal                                               | 3.8-5                      | 847/0.0782/50                                                                              |
| SnO <sub>2</sub> /Layed Carbon <sup>62</sup>              | polymerization and pyrolysis                               | 50-70                      | 700/0.1/115                                                                                |
| bowl-likeSnO <sub>2</sub> @carbon <sup>63</sup>           | template and calcination                                   | 900                        | 963/0.4/100                                                                                |
| SnO/SnO <sub>2</sub> /GNS <sup>64</sup>                   | sonication and refluxing                                   | <30                        | 508/0.1/30                                                                                 |
| SnO <sub>2</sub> nanoparticles <sup>65</sup>              | stir and calcination                                       | 30-50                      | 541.8/0.4/100                                                                              |
| SnO <sub>2</sub> @MIL-101(Cr) <sup>66</sup>               | stir and heat treatment                                    | <50                        | 510/0.079/100                                                                              |
| SnO <sub>2</sub> /NiO Nanotubes <sup>67</sup>             | Electrospinning, calcination and<br>electrospinning method | 20-26                      | 826/1/500                                                                                  |
| SnO <sub>2</sub> hollow nanoplate <sup>68</sup>           | spray pyrolysis and thermal<br>oxidation                   | 5-50                       | 598/0.5/600                                                                                |
